# Supplementary material
Source: PubMed Central journal article supplement (PMC4235837)
Supplement: 13238_2014_88_MOESM1_ESM.pdf [file 13238_2014_88_MOESM1_ESM.pdf]

**Supplementary Table 1. Clinical features of breast cancer patients.**

| Patients' characteristics |                  |        |             |           |              |    |
|---------------------------|------------------|--------|-------------|-----------|--------------|----|
| Case No.                  | Clinical History | Gender | Age (years) | TNM Stage | HER-2 Status | ER |
| BC #1                     | IDC              | Female | 48          | II        | 2+           | 3+ |
| BC #2                     | IDC              | Female | 44          | II        | 2+           | 2+ |
| BC #3                     | ILC              | Female | 58          | II        | 2+           | 3+ |
| BC #4                     | IDC              | Female | 71          | I-II      | -            | -  |
| BC #5                     | IDC              | Female | 30          | II        | 3+           | -  |
| BC #6                     | IDC              | Female | 51          | II        | -            | -  |
| BC #7                     | IDC              | Female | 49          | IV        | -            | 3+ |
